# Supplementary material
Source: PubMed Central journal article supplement (PMC9163630)
Supplement: jcsm.9922.sm001.pdf [file jcsm.9922.sm001.pdf]

**Table S1:** Characteristics of the study sample vs lost to follow-up

|                                                                | Study Population | Lost to Follow-up | p-value |
|----------------------------------------------------------------|------------------|-------------------|---------|
| n                                                              | 100              | 80                |         |
| Age, mean (y, SD)                                              | 4.87 (2.77)      | 4.54 (2.24)       | 0.455   |
| Gender, Male                                                   | 51 (51.00)       | 52 (64.20)        | 0.103   |
| Height, mean (cm, SD)                                          | 105.95 (16.70)   | 105.70 (13.98)    | 0.965   |
| Weight, mean (kg, SD)                                          | 20.28 (14.69)    | 18.44 (8.22)      | 0.851   |
| BMI, mean (kg/m <sup>2</sup> , SD)                             | 16.64 (4.59)     | 15.90 (3.36)      | 0.496   |
| <b>PSG</b>                                                     |                  |                   |         |
| Average value SpO <sub>2</sub> , mean (SD)                     | 95.78 (1.98)     | 95.71 (3.15)      | 0.431   |
| Minimum value SpO <sub>2</sub> , mean (SD)                     | 72.95 (9.79)     | 73.07 (10.35)     | 0.731   |
| Total desaturations, mean (SD)                                 | 152.60 (82.25)   | 143.84 (92.86)    | 0.274   |
| AHI mean (n events/h, SD)                                      | 19.91 (11.37)    | 18.82 (10.28)     | 0.799   |
| <b>Symptoms</b>                                                |                  |                   |         |
| Oral or Mixed breath, n (%)                                    | 93 (93.00)       | 69 (85.19)        | 0.144   |
| Drowsiness, n (%)                                              | 25 (25.00)       | 20 (24.69)        | 1.000   |
| Irritability, n (%)                                            | 41 (41.00)       | 35 (43.21)        | 0.882   |
| Diurnal headache, n (%)                                        | 22 (22.00)       | 14 (17.28)        | 0.546   |
| Nasal voice, n (%)                                             | 76 (76.00)       | 65 (80.25)        | 0.614   |
| Rhinitis                                                       | 68 (68.00)       | 60 (74.07)        | 0.466   |
| recurrent oropharyngeal infections                             | 60 (60.00)       | 49 (60.49)        | 1.000   |
| recurrent bronchial infections                                 | 30 (30.00)       | 22 (27.16)        | 0.799   |
| School problems, n (%)                                         | 7 (7.00)         | 4 (4.94)          | 0.791   |
| Growth delay (height $\leq$ 5 <sup>th</sup> percentile), n (%) | 16 (16.00)       | 18 (22.22)        | 1.000   |
| Nocturnal snoring, n (%)                                       | 96 (96.00)       | 77 (95.06)        | 1.000   |
| Apneas, n (%)                                                  | 90 (90.00)       | 70 (86.42)        | 0.607   |
| Cyanosis, n (%)                                                | 5 (5.00)         | 5 (6.17)          | 0.987   |
| Feeling of suffocation, n (%)                                  | 39 (39.00)       | 39 (48.15)        | 0.278   |
| Nocturnal fears, n (%)                                         | 43 (43.00)       | 37 (45.68)        | 0.833   |
| Nocturnal cough, n (%)                                         | 44 (44.00)       | 42 (51.85)        | 0.367   |
| Wheezing                                                       | 34 (34.34)       | 28 (34.57)        | 1.000   |
| Insomnia, n (%)                                                | 24 (24.00)       | 11 (13.58)        | 0.115   |
| Enureses                                                       | 30 (30.00)       | 30 (37.04)        | 0.400   |

## Appendix 1 Questionnaire in Italian

### Sezione 1

|                                                                                                                                                                                                                                                                                                                                                                                                                                                                                                                                                                                                                                                       |
|-------------------------------------------------------------------------------------------------------------------------------------------------------------------------------------------------------------------------------------------------------------------------------------------------------------------------------------------------------------------------------------------------------------------------------------------------------------------------------------------------------------------------------------------------------------------------------------------------------------------------------------------------------|
| 1) Russa? <ul style="list-style-type: none"><li>▪ Sì</li><li>▪ No</li><li>▪ Non so</li></ul>                                                                                                                                                                                                                                                                                                                                                                                                                                                                                                                                                          |
| Risponda alle seguenti domande solo se ha risposto <i>Sì</i> alla domanda precedente:<br>2A) Il suo russamento è: <ul style="list-style-type: none"><li>▪ lievemente più rumoroso di un respiro</li><li>▪ rumoroso come il parlare</li><li>▪ più rumoroso del parlare</li><li>▪ molto rumoroso</li></ul> 2B) Russa spesso? <ul style="list-style-type: none"><li>▪ Più o meno tutte le notti</li><li>▪ 3-4 notti a settimana</li><li>▪ 1-2 notti a settimana</li><li>▪ 1-2 notti al mese</li><li>▪ Mai o quasi mai</li></ul> 2C) Il suo russamento ha mai disturbato altre persone? <ul style="list-style-type: none"><li>▪ Sì</li><li>▪ No</li></ul> |
| 3) Qualcuno ha notato che interrompe il respiro durante il sonno? <ul style="list-style-type: none"><li>▪ Più o meno tutte le notti</li><li>▪ 3-4 notti a settimana</li><li>▪ 1-2 notti a settimana</li><li>▪ 1-2 notti al mese</li><li>▪ Mai o quasi mai</li></ul>                                                                                                                                                                                                                                                                                                                                                                                   |

### Sezione 2

|                                                          |
|----------------------------------------------------------|
| 3) Indichi la sua altezza:<br>cm                         |
| 4) Indichi il suo peso:<br>kg                            |
| 5) Soffre di ipertensione arteriosa?      ▪ Sì      ▪ No |

### Attribuzione del punteggio

La prima sezione è positiva quando il punteggio ottenuto è uguale o superiore a 2. Il punteggio è attribuito con la seguente modalità:

- Domanda 1: 1 punto se la risposta è "Sì"
- Domanda 2A: 1 punto se la risposta è *c* o *d*
- Domanda 2B: 1 punto se la risposta è *a* o *b*
- Domanda 2C: 1 punto se la risposta è *a*
- Domanda 3: 2 punti se la risposta è *a* o *b*

La seconda sezione è positiva quando il BMI è uguale o superiore a 30 kg/m<sup>2</sup>, oppure quando si ottiene risposta positiva alla domanda relativa alla presenza di ipertensione arteriosa.

Ad integrazione del Questionario di Berlino sono state strutturate le seguenti domande:

|                                                                            |      |      |
|----------------------------------------------------------------------------|------|------|
| 7) Soffre di ipercolesterolemia/ipertigliceridemia?                        | ▪ Sì | ▪ No |
| 8) Soffre di problemi cardiaci?                                            | ▪ Sì | ▪ No |
| 9) Le capitano frequentemente le seguenti condizioni?                      |      |      |
| - Sonnolenza durante il giorno                                             | ▪ Sì | ▪ No |
| - Cefalea al mattino                                                       | ▪ Sì | ▪ No |
| - Irritabilità                                                             | ▪ Sì | ▪ No |
| - Respiro                                                                  | ▪ Sì | ▪ No |
| - Voce nasale                                                              | ▪ Sì | ▪ No |
| - Insonnia                                                                 | ▪ Sì | ▪ No |
| - Tosse notturna                                                           | ▪ Sì | ▪ No |
| - Sensazione di soffocamento durante la notte                              | ▪ Sì | ▪ No |
| - Incubi                                                                   | ▪ Sì | ▪ No |
| - Movimenti notturni                                                       | ▪ Sì | ▪ No |
| - Infezioni delle alte vie aeree ricorrenti                                | ▪ Sì | ▪ No |
| - Bronchiti ricorrenti                                                     | ▪ Sì | ▪ No |
| 10) Ha mai effettuato interventi chirurgici di tipo Otorinolaringoiatrico? |      |      |
| ▪ Nessuno                                                                  |      |      |
| ▪ Adenoidectomia                                                           |      |      |
| ▪ Tonsillectomia                                                           |      |      |
| ▪ Adenotonsillectomia                                                      |      |      |
| ▪ Altro:                                                                   |      |      |
| 11) Qual è il suo titolo di studio?                                        |      |      |
| ▪ Licenza media                                                            |      |      |
| ▪ Diploma di maturità                                                      |      |      |
| ▪ Laurea                                                                   |      |      |

## Appendix 2 Questionnaire in English

### Section 1

|                                                                                                                                                                                                                                                                                                                                                                                                                                                                                                                 |
|-----------------------------------------------------------------------------------------------------------------------------------------------------------------------------------------------------------------------------------------------------------------------------------------------------------------------------------------------------------------------------------------------------------------------------------------------------------------------------------------------------------------|
| 1) Do you snore ? <ul style="list-style-type: none"><li>• Yes</li><li>• No</li><li>• I don't know</li></ul>                                                                                                                                                                                                                                                                                                                                                                                                     |
| If you snore:<br>2A) Your snoring is: <ul style="list-style-type: none"><li>• Slightly louder than breathing</li><li>• As loud as talking</li><li>• Louder than talking</li><li>• Very loud – can be heard in adjacent rooms</li></ul> 2B) How often do you snore? <ul style="list-style-type: none"><li>• Nearly every day</li><li>• 3-4 times a week</li><li>• 1-2 times a week</li><li>• 1-2 times a month</li><li>• Never or nearly never</li></ul> 2C) Has your snoring ever bothered other people? Yes No |
| 3) Has anyone noticed that you quit breathing during your sleep? <ul style="list-style-type: none"><li>• Nearly every day</li><li>• 3-4 times a week</li><li>• 1-2 times a week</li><li>• 1-2 times a month</li><li>• Never or nearly never</li></ul>                                                                                                                                                                                                                                                           |

### Section 2

|                                                |
|------------------------------------------------|
| 3) Indicate your height:<br>cm _____           |
| 4) Indicate your weight:<br>kg _____           |
| 5) Do you have high blood pressure? ▪ Yes ▪ No |

### Scoring

The first section is positive when the score obtained is equal to or greater than 2. The score is assigned in the following way:

- Question 1: 1 point if the answer is "Yes"
- Question 2A: 1 point if the answer is c or d
- Question 2B: 1 point if the answer is a or b
- Question 2C: 1 point if the answer is a
- Question 3: 2 points if the answer is a or b

The second section is positive when the BMI is equal to or greater than 30 kg / m<sup>2</sup>, or when a positive response is obtained to the question relating to the presence of arterial hypertension.

In addition to the Berlin Questionnaire, the following questions have been structured:

|                                                                               |            |
|-------------------------------------------------------------------------------|------------|
| 7) Do you suffer from hypercholesterolemia / hypertriglyceridemia? ▪ Yes ▪ No |            |
| 8) Do you suffer from heart problems? ▪ Yes ▪ No                              |            |
| 9) Do the following conditions occur frequently?                              |            |
| - Sleepiness during the day                                                   | ▪ Yes ▪ No |
| - Headache in the morning                                                     | ▪ Yes ▪ No |
| - Irritability                                                                | ▪ Yes ▪ No |
| - Breath                                                                      | ▪ Yes ▪ No |
| - Nasal voice                                                                 | ▪ Yes ▪ No |
| - Insomnia                                                                    | ▪ Yes ▪ No |
| - Night cough                                                                 | ▪ Yes ▪ No |
| - Feeling of suffocation at night                                             | ▪ Yes ▪ No |
| - Nightmares                                                                  | ▪ Yes ▪ No |
| - Nocturnal movements                                                         | ▪ Yes ▪ No |
| - Recurrent upper respiratory tract infections                                | ▪ Yes ▪ No |
| - Recurrent bronchitis                                                        | ▪ Yes ▪ No |
| 10) Have you ever undergone Otolaryngology surgery?                           |            |
| • None                                                                        |            |
| • Adenoidectomy                                                               |            |
| • Tonsillectomy                                                               |            |
| • Adenotonsillectomy                                                          |            |
| • Other: _____                                                                |            |
| 11) What is your educational qualification?                                   |            |
| • Medium license                                                              |            |
| • High school diploma                                                         |            |
| • Degree                                                                      |            |
